# Supplementary material
Source: publisher figshare collection journal article supplement (https://plos.figshare.com/articles/dataset/_/1600055)
Supplement: Supplementary file [file 1]

### Variable Information

| Variable     | Position | Label                    | Measurement Level | Role  | Column Width |
|--------------|----------|--------------------------|-------------------|-------|--------------|
| ID           | 1        | ID number                | Scale             | Input | 8            |
| Condition    | 2        | Condition                | Nominal           | Input | 19           |
| Brusje       | 3        | Filter kinship           | Nominal           | Input | 8            |
| Relation     | 4        | Relation parent to child | Nominal           | Input | 10           |
| Sex_c        | 5        | Gender child             | Nominal           | Input | 8            |
| Date_birth_C | 6        | Date of birth child      | Scale             | Input | 8            |
| Date_birth_P | 7        | Date of birth parent     | Scale             | Input | 8            |
| age_c        | 8        | age child                | Scale             | Input | 10           |
| age_p        | 9        | age parent               | Scale             | Input | 10           |
| Family       | 10       | Living situation family  | Nominal           | Input | 8            |
| GebOuder1    | 11       | Place of birth parent 1  | Nominal           | Input | 11           |
| GebOuder2    | 12       | Place of birth parent 2  | Nominal           | Input | 11           |
| GebOuders    | 13       | Filter genetic ancestry  | Nominal           | Input | 11           |
| Education    | 14       | Parental education       | Nominal           | Input | 8            |
| Employment   | 15       | Parental employment      | Nominal           | Input | 8            |
| SNPAllel1    | 16       | SNP allele 1             | Nominal           | Input | 12           |
| SNPAllel2    | 17       | SNP allele 2             | Nominal           | Input | 14           |
| @5HTTAllel1  | 18       | VNTR allele 1            | Nominal           | Input | 12           |
| @5HTTAllel2  | 19       | VNTR allele 2            | Nominal           | Input | 12           |
| @TRIALLELIC  | 20       | Tri-alleltic factor      | Nominal           | Input | 13           |
| @5HTTgen     | 21       | 5-HTTLPR VNTR genotype   | Nominal           | Input | 10           |
| @SNP         | 22       | 5-HTTLPR SNP genotype    | Nominal           | Input | 10           |
| preBang      | 23       | self-reported pre fear   | Nominal           | Input | 8            |
| preBedroefd  | 24       | self-reported pre sad    | Nominal           | Input | 8            |
| preBezorgd   | 25       | self-reported pre fear   | Nominal           | Input | 8            |

# Variable Information

| Variable     | Alignment | Print Format | Write Format | Missing Values              |
|--------------|-----------|--------------|--------------|-----------------------------|
| ID           | Right     | F40          | F40          | 999                         |
| Condition    | Right     | F8           | F8           | 999                         |
| Brusje       | Right     | F8.2         | F8.2         | 999.00                      |
| Relation     | Right     | F8.2         | F8.2         | 999.00                      |
| Sex_c        | Right     | F8           | F8           | 999                         |
| Date_birth_C | Left      | DATE20       | DATE20       | 04-Oct-1582,<br>04-Oct-1582 |
| Date_birth_P | Left      | DATE20       | DATE20       | 04-Oct-1582,<br>04-Oct-1582 |
| age_c        | Right     | F8.2         | F8.2         | 999.00                      |
| age_p        | Right     | F8.2         | F8.2         | 999.00                      |
| Family       | Left      | F12          | F12          | 999, 888                    |
| GebOuder1    | Right     | F8.2         | F8.2         | 999.00                      |
| GebOuder2    | Right     | F8.2         | F8.2         | 999.00                      |
| GebOuders    | Right     | F8.2         | F8.2         | 999.00                      |
| Education    | Left      | F12          | F12          | 999, 888                    |
| Employment   | Left      | F12          | F12          | 999, 888                    |
| SNPAllel1    | Right     | F12          | F12          | 999                         |
| SNPAllel2    | Right     | F1           | F1           | 999                         |
| @5HTTAllel1  | Right     | F12          | F12          | 999                         |
| @5HTTAllel2  | Right     | F1           | F1           | 999                         |
| @TRIALLELIC  | Right     | F8.2         | F8.2         | 999.00                      |
| @5HTTgen     | Right     | F8           | F8           | 999                         |
| @SNP         | Right     | F8.2         | F8.2         | 999.00                      |
| preBang      | Right     | F8.2         | F8.2         | 999.00                      |
| preBedroefd  | Right     | F8.2         | F8.2         | 999.00                      |
| preBezorgd   | Right     | F8.2         | F8.2         | 999.00                      |

### Variable Information

| Variable       | Position | Label                       | Measurement Level | Role  | Column Width |
|----------------|----------|-----------------------------|-------------------|-------|--------------|
| preBlij        | 26       | self-reported<br>pre happy  | Nominal           | Input | 8            |
| preBoos        | 27       | self-reported<br>pre angry  | Nominal           | Input | 8            |
| preDroevig     | 28       | self-reported<br>pre sad    | Nominal           | Input | 8            |
| preGelukkig    | 29       | self-reported<br>pre happy  | Nominal           | Input | 8            |
| preKwaad       | 30       | self-reported<br>pre angry  | Nominal           | Input | 8            |
| preOngerust    | 31       | self-reported<br>pre fear   | Nominal           | Input | 8            |
| preSlecht      | 32       | self-reported<br>pre angry  | Nominal           | Input | 8            |
| preVerdrietig  | 33       | self-reported<br>pre sad    | Nominal           | Input | 8            |
| preVrolijk     | 34       | self-reported<br>pre happy  | Scale             | Input | 8            |
| postBang       | 35       | self-reported<br>post fear  | Nominal           | Input | 8            |
| postBedroefd   | 36       | self-reported<br>post sad   | Nominal           | Input | 8            |
| postBezorgd    | 37       | self-reported<br>post fear  | Nominal           | Input | 8            |
| postBlij       | 38       | self-reported<br>post happy | Nominal           | Input | 8            |
| postBoos       | 39       | self-reported<br>post angry | Nominal           | Input | 8            |
| postDroevig    | 40       | self-reported<br>post sad   | Nominal           | Input | 8            |
| postGelukkig   | 41       | self-reported<br>post happy | Nominal           | Input | 8            |
| postKwaad      | 42       | self-reported<br>post angry | Nominal           | Input | 8            |
| postOngerust   | 43       | self-reported<br>post fear  | Nominal           | Input | 8            |
| postSlecht     | 44       | self-reported<br>post angry | Nominal           | Input | 8            |
| postVerdrietig | 45       | self-reported<br>post sad   | Nominal           | Input | 8            |
| postVrolijk    | 46       | self-reported<br>post happy | Nominal           | Input | 8            |
| MPreSad        | 47       | Mean pre sad                | Scale             | Input | 10           |
| MPreAngry      | 48       | Mean pre<br>angry           | Scale             | Input | 11           |
| MPreHappy      | 49       | Mean pre<br>happy           | Scale             | Input | 11           |

### Variable Information

| Variable       | Alignment | Print Format | Write Format | Missing Values |
|----------------|-----------|--------------|--------------|----------------|
| preBlij        | Right     | F8.2         | F8.2         | 999.00         |
| preBoos        | Right     | F8.2         | F8.2         | 999.00         |
| preDroevig     | Right     | F8.2         | F8.2         | 999.00         |
| preGelukkig    | Right     | F8.2         | F8.2         | 999.00         |
| preKwaad       | Right     | F8.2         | F8.2         | 999.00         |
| preOngerust    | Right     | F8.2         | F8.2         | 999.00         |
| preSlecht      | Right     | F8.2         | F8.2         | 999.00         |
| preVerdrietig  | Right     | F8.2         | F8.2         | 999.00         |
| preVrolijk     | Right     | F8.2         | F8.2         | 999.00         |
| postBang       | Right     | F8.2         | F8.2         | 999.00         |
| postBedroefd   | Right     | F8.2         | F8.2         | 999.00         |
| postBezorgd    | Right     | F8.2         | F8.2         | 999.00         |
| postBlij       | Right     | F8.2         | F8.2         | 999.00         |
| postBoos       | Right     | F8.2         | F8.2         | 999.00         |
| postDroevig    | Right     | F8.2         | F8.2         | 999.00         |
| postGelukkig   | Right     | F8.2         | F8.2         | 999.00         |
| postKwaad      | Right     | F8.2         | F8.2         | 999.00         |
| postOngerust   | Right     | F8.2         | F8.2         | 999.00         |
| postSlecht     | Right     | F8.2         | F8.2         | 999.00         |
| postVerdrietig | Right     | F8.2         | F8.2         | 999.00         |
| postVrolijk    | Right     | F8.2         | F8.2         | 999.00         |
| MPreSad        | Right     | F8.2         | F8.2         | 999.00         |
| MPreAngry      | Right     | F8.2         | F8.2         | 999.00         |
| MPreHappy      | Right     | F8.2         | F8.2         | 999.00         |

### Variable Information

| Variable   | Position | Label                                                                      | Measurement Level | Role  | Column Width |
|------------|----------|----------------------------------------------------------------------------|-------------------|-------|--------------|
| MPreFear   | 50       | Mean pre fear                                                              | Scale             | Input | 10           |
| MPostSad   | 51       | Mean post sad                                                              | Scale             | Input | 10           |
| MPostAngry | 52       | Mean post angry                                                            | Scale             | Input | 12           |
| MPostHappy | 53       | Mean post happy                                                            | Scale             | Input | 12           |
| MPostFear  | 54       | Mean post fear                                                             | Scale             | Input | 11           |
| EMG        | 55       | EMG succesfull yes/no                                                      | Nominal           | Input | 8            |
| MCorBase   | 56       | Mean Baseline Corrugator                                                   | Scale             | Input | 8            |
| MZygoBase  | 57       | Mean Baseline Zygomaticus                                                  | Scale             | Input | 8            |
| MCorResp   | 58       | Mean Respons Corrugator                                                    | Scale             | Input | 8            |
| MZygoResp  | 59       | Mean Respons Zygomaticus                                                   | Scale             | Input | 8            |
| APQ1_A     | 60       | Alabama Parenting Questionnaire : U heeft een gezellig gesprek met uw kind | Nominal           | Input | 8            |
| APQ1_B     | 61       | U laat het uw kind weten als hij/zij zijn/h                                | Nominal           | Input | 8            |
| APQ1_C     | 62       | U dreigt uw kind te straffen, maar straft h                                | Nominal           | Input | 8            |
| APQ1_D     | 63       | U helpt als vrijwilliger mee met speciale a                                | Nominal           | Input | 8            |

### Variable Information

| Variable   | Alignment | Print Format | Write Format | Missing Values      |
|------------|-----------|--------------|--------------|---------------------|
| MPreFear   | Right     | F8.2         | F8.2         | 999.00              |
| MPostSad   | Right     | F8.2         | F8.2         | 999.00              |
| MPostAngry | Right     | F8.2         | F8.2         | 999.00              |
| MPostHappy | Right     | F8.2         | F8.2         | 999.00              |
| MPostFear  | Right     | F8.2         | F8.2         | 999.00              |
| EMG        | Right     | F8.2         | F8.2         | 999.00              |
| MCorBase   | Right     | F8.3         | F8.3         | 999.000,<br>666.000 |
| MZygoBase  | Right     | F8.3         | F8.3         | 999.000,<br>666.000 |
| MCorResp   | Right     | F8.3         | F8.3         | 999.000,<br>666.000 |
| MZygoResp  | Right     | F8.3         | F8.3         | 999.000,<br>666.000 |
| APQ1_A     | Left      | F12          | F12          | 999, 888            |
| APQ1_B     | Left      | F12          | F12          | 999, 888            |
| APQ1_C     | Left      | F12          | F12          | 999, 888            |
| APQ1_D     | Left      | F12          | F12          | 999, 888            |

# Variable Information

| Variable | Position | Label                                       | Measurement Level | Role  | Column Width |
|----------|----------|---------------------------------------------|-------------------|-------|--------------|
| APQ1_E   | 64       | U beloont uw kind of geeft hem/haar iets ex | Nominal           | Input | 8            |
| APQ1_F   | 65       | Het lukt uw kind niet om een briefje achter | Nominal           | Input | 8            |
| APQ1_G   | 66       | U speelt spelletjes of doet andere leuke di | Nominal           | Input | 8            |
| APQ1_H   | 67       | Uw kind haalt u over om hem/haar niet te st | Nominal           | Input | 8            |
| APQ1_I   | 68       | U vraagt uw kind over zijn/haar dag op scho | Nominal           | Input | 8            |
| APQ1_J   | 69       | Uw kind blijft 's avonds later buiten dan d | Nominal           | Input | 8            |
| APQ1_K   | 70       | U helpt uw kind met zijn/haar huiswerk      | Nominal           | Input | 8            |
| APQ1_L   | 71       | U heeft het gevoel dat het meer problemen o | Nominal           | Input | 8            |
| APQ1_M   | 72       | U geeft uw kind een complimentje als hij/zi | Nominal           | Input | 8            |
| APQ1_N   | 73       | U vraagt uw kind wat zijn/haar plannen zijn | Nominal           | Input | 8            |
| APQ1_O   | 74       | U brengt uw kind met de auto, fiets of het  | Nominal           | Input | 8            |

# Variable Information

| Variable | Alignment | Print Format | Write Format | Missing Values |
|----------|-----------|--------------|--------------|----------------|
| APQ1_E   | Left      | F12          | F12          | 999, 888       |
| APQ1_F   | Left      | F12          | F12          | 999, 888       |
| APQ1_G   | Left      | F12          | F12          | 999, 888       |
| APQ1_H   | Left      | F12          | F12          | 999, 888       |
| APQ1_I   | Left      | F12          | F12          | 999, 888       |
| APQ1_J   | Left      | F12          | F12          | 999, 888       |
| APQ1_K   | Left      | F12          | F12          | 999, 888       |
| APQ1_L   | Left      | F12          | F12          | 999, 888       |
| APQ1_M   | Left      | F12          | F12          | 999, 888       |
| APQ1_N   | Left      | F12          | F12          | 999, 888       |
| APQ1_O   | Left      | F12          | F12          | 999, 888       |



### Variable Information

| Variable | Position | Label                                                                   | Measurement Level | Role  | Column Width |
|----------|----------|-------------------------------------------------------------------------|-------------------|-------|--------------|
| APQ2_A   | 75       | U prijst uw kind als hij/zij zich goed gedraagt                         | Nominal           | Input | 8            |
| APQ2_B   | 76       | Uw kind is weg met vrienden die u niet kent                             | Nominal           | Input | 8            |
| APQ2_C   | 77       | U knuffelt of kust uw kind als hij/zij iets goed heeft gedaan           | Nominal           | Input | 8            |
| APQ2_D   | 78       | Uw kind gaat weg zonder een afgesproken tijd om thuis te zijn           | Nominal           | Input | 8            |
| APQ2_E   | 79       | U praat met uw kind over zijn/ haar vrienden                            | Nominal           | Input | 8            |
| APQ2_F   | 80       | Uw kind is na het donker buiten zonder een volwassene bij zich          | Nominal           | Input | 8            |
| APQ2_G   | 81       | U stopt eerder met een straf van uw kind (zoals het eerder opheffen van | Nominal           | Input | 8            |
| APQ2_H   | 82       | Uw kind helpt mee om plannen te maken voor gezinsactiviteiten           | Nominal           | Input | 8            |

# Variable Information

| Variable | Alignment | Print Format | Write Format | Missing Values |
|----------|-----------|--------------|--------------|----------------|
| APQ2_A   | Left      | F12          | F12          | 999, 888       |
| APQ2_B   | Left      | F12          | F12          | 999, 888       |
| APQ2_C   | Left      | F12          | F12          | 999, 888       |
| APQ2_D   | Left      | F12          | F12          | 999, 888       |
| APQ2_E   | Left      | F12          | F12          | 999, 888       |
| APQ2_F   | Left      | F12          | F12          | 999, 888       |
| APQ2_G   | Left      | F12          | F12          | 999, 888       |
| APQ2_H   | Left      | F12          | F12          | 999, 888       |

### Variable Information

| Variable | Position | Label                                                                     | Measurement Level | Role  | Column Width |
|----------|----------|---------------------------------------------------------------------------|-------------------|-------|--------------|
| APQ2_I   | 83       | U krijgt het zo druk dat u vergeet waar uw kind is of wat hij/ zij aan    | Nominal           | Input | 8            |
| APQ2_J   | 84       | Uw kind wordt niet gestraft als hij/ zij iets fout heeft gedaan           | Nominal           | Input | 8            |
| APQ2_K   | 85       | U gaat naar ouderavonden of andere bijeenkomsten op de school van uw kind | Nominal           | Input | 8            |
| APQ2_L   | 86       | U vertelt uw kind dat u het fijn vindt als hij/ zij u meehelpt rondom h   | Nominal           | Input | 8            |
| APQ2_M   | 87       | U controleert niet of uw kind thuis komt op de tijd waarop hij/ zij ver   | Nominal           | Input | 8            |
| APQ2_N   | 88       | U vertelt uw kind niet waar u heengaat                                    | Nominal           | Input | 8            |
| APQ2_O   | 89       | Uw kind komt meer dan een uur later van school dan u hem/haar verwacht    | Nominal           | Input | 8            |
| APQ3_A   | 90       | De straf die u uw kind geeft hangt af van uw stemming                     | Nominal           | Input | 8            |

# Variable Information

| Variable | Alignment | Print Format | Write Format | Missing Values |
|----------|-----------|--------------|--------------|----------------|
| APQ2_I   | Left      | F12          | F12          | 999, 888       |
| APQ2_J   | Left      | F12          | F12          | 999, 888       |
| APQ2_K   | Left      | F12          | F12          | 999, 888       |
| APQ2_L   | Left      | F12          | F12          | 999, 888       |
| APQ2_M   | Left      | F12          | F12          | 999, 888       |
| APQ2_N   | Left      | F12          | F12          | 999, 888       |
| APQ2_O   | Left      | F12          | F12          | 999, 888       |
| APQ3_A   | Left      | F12          | F12          | 999, 888       |

### Variable Information

| Variable | Position | Label                                                                    | Measurement Level | Role  | Column Width |
|----------|----------|--------------------------------------------------------------------------|-------------------|-------|--------------|
| APQ3_B   | 91       | Uw kind is thuis zonder volwassen toezicht                               | Nominal           | Input | 8            |
| APQ3_C   | 92       | U geeft uw kind een tik voor haar billen wanneer hij/zij iets fout heeft | Nominal           | Input | 8            |
| APQ3_D   | 93       | U negeert uw kind, wanneer hij/ zij zich aan het misdragen is            | Nominal           | Input | 8            |
| APQ3_E   | 94       | U geeft uw kind een klap met uw hand, wanneer hij/ zij iets fout heeft   | Nominal           | Input | 8            |
| APQ3_F   | 95       | Als straf neemt u privileges of geld van uw kind weg                     | Nominal           | Input | 8            |
| APQ3_G   | 96       | Als straf stuurt u uw kind naar zijn/ haar kamer                         | Nominal           | Input | 8            |
| APQ3_H   | 97       | U slaat uw kind met een riem, (rij) zweep of ander voorwerp als hij/ zij | Nominal           | Input | 8            |

# Variable Information

| Variable | Alignment | Print Format | Write Format | Missing Values |
|----------|-----------|--------------|--------------|----------------|
| APQ3_B   | Left      | F12          | F12          | 999, 888       |
| APQ3_C   | Left      | F12          | F12          | 999, 888       |
| APQ3_D   | Left      | F12          | F12          | 999, 888       |
| APQ3_E   | Left      | F12          | F12          | 999, 888       |
| APQ3_F   | Left      | F12          | F12          | 999, 888       |
| APQ3_G   | Left      | F12          | F12          | 999, 888       |
| APQ3_H   | Left      | F12          | F12          | 999, 888       |

### Variable Information

| Variable | Position | Label                                                                   | Measurement Level | Role  | Column Width |
|----------|----------|-------------------------------------------------------------------------|-------------------|-------|--------------|
| APQ3_I   | 98       | U gilt of schreeuwt tegen uw kind als hij/ zij iets verkeerd heeft geda | Nominal           | Input | 8            |
| APQ3_J   | 99       | Als uw kind zich misdraagt, legt u hem/ haar rustig uit waarom zijn/ ha | Nominal           | Input | 8            |
| APQ3_K   | 100      | Als straf zet u uw kind apart (op de gang of in een hoek van de kamer)  | Nominal           | Input | 8            |
| APQ3_L   | 101      | Als straf geeft u uw kind extra karweitjes                              | Nominal           | Input | 8            |
| M_APQ_PP | 102      | Mean positive parenting                                                 | Scale             | Input | 10           |
| M_APQ_CP | 103      | Mean corporal punishment                                                | Scale             | Input | 10           |
| M_APQ_ID | 104      | Mean inconsequent discipline                                            | Scale             | Input | 10           |
| M_APQ_I  | 105      | Mean involvement                                                        | Scale             | Input | 10           |
| M_APQ_PM | 106      | Mean parental monitoring                                                | Scale             | Input | 10           |
| M_APQ_O  | 107      | Mean other                                                              | Scale             | Input | 10           |
| M_PP     | 108      | SCALE positive parenting                                                | Scale             | Input | 10           |
| M_NP     | 109      | SCALE negative parenting                                                | Scale             | Input | 10           |
| M_NP_CEN | 110      | Centered negative parenting                                             | Scale             | Input | 10           |

# Variable Information

| Variable | Alignment | Print Format | Write Format | Missing Values    |
|----------|-----------|--------------|--------------|-------------------|
| APQ3_I   | Left      | F12          | F12          | 999, 888          |
| APQ3_J   | Left      | F12          | F12          | 999, 888          |
| APQ3_K   | Left      | F12          | F12          | 999, 888          |
| APQ3_L   | Left      | F12          | F12          | 999, 888          |
| M_APQ_PP | Right     | F8.2         | F8.2         | 999.00,<br>888.00 |
| M_APQ_CP | Right     | F8.2         | F8.2         | 999.00,<br>888.00 |
| M_APQ_ID | Right     | F8.2         | F8.2         | 999.00,<br>888.00 |
| M_APQ_I  | Right     | F8.2         | F8.2         | 999.00            |
| M_APQ_PM | Right     | F8.2         | F8.2         | 999.00            |
| M_APQ_O  | Right     | F8.2         | F8.2         | 999.00,<br>888.00 |
| M_PP     | Right     | F8.2         | F8.2         | 999.00            |
| M_NP     | Right     | F8.2         | F8.2         | 999.00            |
| M_NP_CEN | Right     | F8.2         | F8.2         | 999.00            |



### Variable Information

| Variable | Position | Label                       | Measurement Level | Role  | Column Width |
|----------|----------|-----------------------------|-------------------|-------|--------------|
| M_PP_CEN | 111      | Centered positive parenting | Scale             | Input | 10           |
| MPreNA   | 112      | Prescore negative affect    | Scale             | Input | 10           |
| MPostNA  | 113      | Postscore negative affect   | Scale             | Input | 10           |

### Variable Information

| Variable | Alignment | Print Format | Write Format | Missing Values |
|----------|-----------|--------------|--------------|----------------|
| M_PP_CEN | Right     | F8.2         | F8.2         | 999.00         |
| MPreNA   | Right     | F8.2         | F8.2         | 999.00         |
| MPostNA  | Right     | F8.2         | F8.2         | 999.00         |

Variables in the working file
